# Supplementary material
Source: PubMed Central journal article supplement (PMC2383962)
Supplement: 0711084105_Supplemental_PDF.pdf [file 0711084105_Supplemental_PDF.pdf]

# Supporting Information

Kamikawa *et al.* 10.1073/pnas.0711084105

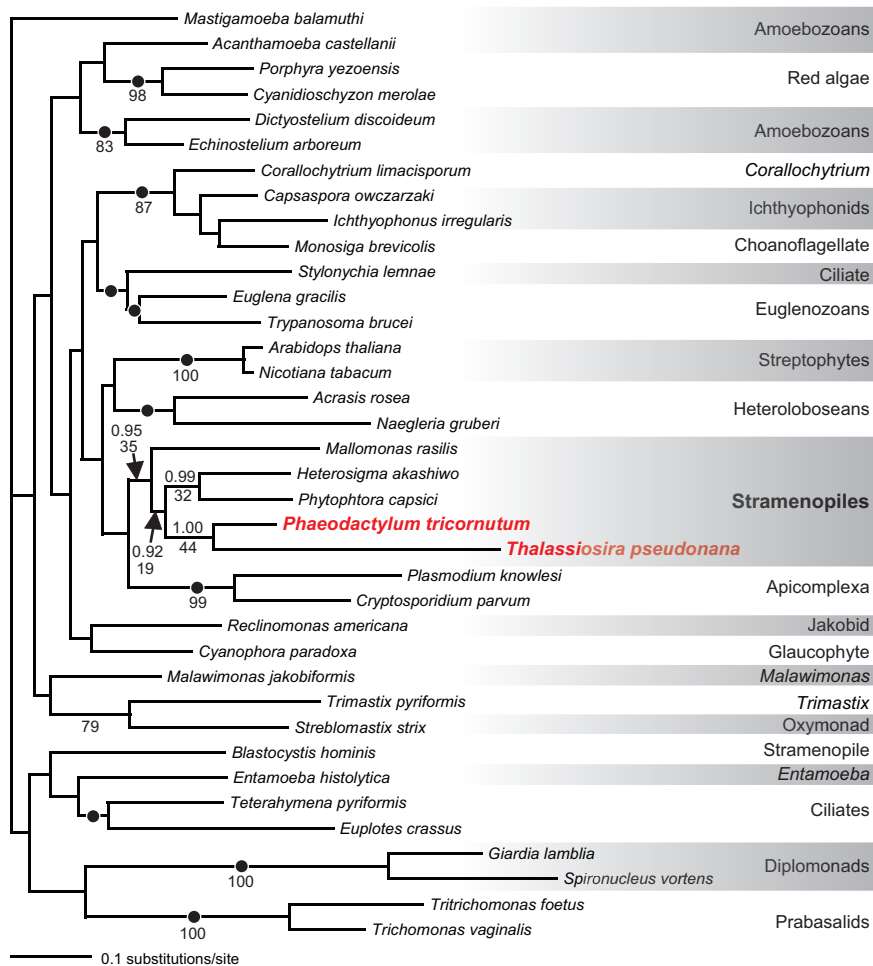

**Fig. S1.** Maximum-likelihood EF-1 $\alpha$  phylogeny estimated by IQPNNI v.3.1. The diatom sequences are highlighted in red. The ML bootstrap values and Bayesian posterior probabilities for the nodes that are significant for the origin of the diatom homologues are shown. For other nodes, only ML bootstrap values  $\geq 70\%$  are indicated. Bayesian posterior probabilities  $\geq 0.95$  calculated by MrBayes v. 3.1.1 are also highlighted by dots.

**A**  $P/T$ KK motif

|                     |                        |
|---------------------|------------------------|
| Yeast EF-1 $\alpha$ | KKVGYNPKT-----VPFVP    |
| Thapse EFL          | QMIGFKPKK-----VPFIP    |
| Linpol EFL          | VKVGWK-----KDFVEKCVILP |

**B** K indel

|                     |            |
|---------------------|------------|
| Yeast EF-1 $\alpha$ | LI IAGGVGE |
| Thapse EFL          | LVP AEKGGF |
| Linpol EFL          | MVPAD-GNF  |

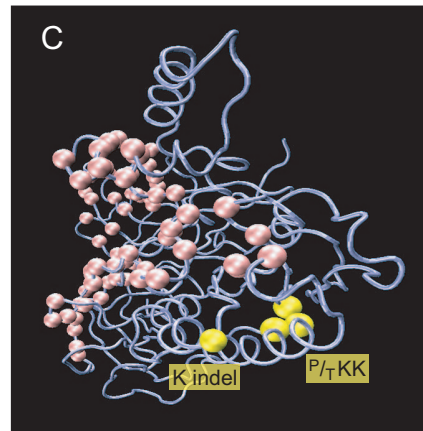

**Fig. S2.**  $P/T$ KK motif and K indel. (*A* and *B*)  $P/T$ KK motif (*A*) and K indel (*B*) in the primary structure. Yeast EF-1 $\alpha$ , *Thalassiosira* (Thapse) EFL, and *Ligulodinium* (Linpol) EFL sequences are aligned. The motifs are highlighted in yellow. (*C*) The two motifs in the putative EF-1 $\alpha$ /EFL tertiary structure. The EFL motifs are mapped on yeast EF-1 $\alpha$  tertiary structure (PDB ID code 1IJF). The putative residues that are responsible for elongation factor functions in EF-1 $\alpha$  (9) are highlighted in pink. The residues that correspond to the EFL motifs are highlighted in yellow.

**Table S1. Clones obtained in the initial RT-PCR survey**

| Species   | EFL                                | EF-1 $\alpha$ | eRF3 | HBS1 | Others* | Total |    |
|-----------|------------------------------------|---------------|------|------|---------|-------|----|
| Centrales | <i>Chaetoceras dydimus</i>         | 5             | 0    | 4    | 0       | 4     | 13 |
|           | <i>Detonula confervacea</i>        | 10            | 1    | 0    | 0       | 0     | 11 |
|           | <i>Ditylum brightwellii</i>        | 11            | 0    | 0    | 0       | 0     | 11 |
|           | <i>Skeletonema costatum</i>        | 12            | 0    | 0    | 2       | 0     | 14 |
| Pennales  | <i>Asterionella glacialis</i>      | 4             | 1    | 8    | 0       | 2     | 15 |
|           | <i>Achnanthes kawaiensis</i>       | 12            | 1    | 0    | 0       | 0     | 13 |
|           | <i>Cylindrotheca closterium</i>    | 7             | 0    | 3    | 0       | 2     | 12 |
|           | <i>Thalassionema nitzschioides</i> | 8             | 1    | 0    | 0       | 0     | 9  |

eRF3, eukaryotic release factor 3; HBS1, hsp70 subfamily B suppressor 1.

\*Sequences that do not belong to eukaryotic EF-1 $\alpha$  superfamily.

**Table S2. Primers used for the RT real-time PCR assay**

| Gene              | Target species | Primers   |                                | Annealing temp., deg. C |
|-------------------|----------------|-----------|--------------------------------|-------------------------|
|                   |                | Direction | Sequence                       |                         |
| EF-1 $\alpha$     | <i>Tp</i>      | Forward   | 5'-CCACCACAACTGGGCATCTA-3'     | 55                      |
|                   |                | Reverse   | 5'-ACTACTGTGAAATCATACTTTGG-3'  |                         |
|                   | <i>Pt</i>      | Forward   | 5'-CACTACTGGTCATTTGATC-3'      | 52                      |
|                   |                | Reverse   | 5'-ATGACGGTAAAGGAGTATTTGG-3'   |                         |
| EFL               | <i>Tp</i>      | Forward   | 5'-GGACACTTGATCTTCAAGC-3'      | 55                      |
|                   |                | Reverse   | 5'-GACAATGGTGTAGTGGTACTTTTC-3' |                         |
| $\alpha$ -tubulin | <i>Tp</i>      | Forward   | 5'-CAAGTGTGATCCTCGTCACGG-3'    | 60                      |
|                   |                | Reverse   | 5'-GCAACCATGCACACGGCACG-3'     |                         |
|                   | <i>Pt</i>      | Forward   | 5'-CAAGTGTGATCCTCGTCACGG-3'    | 60                      |
|                   |                | Reverse   | 5'-GCAACCATGCACACGGCACG-3'     |                         |

*Tp*, *Thalassiosira pseudonana*; *Pt*, *Phaeodactylum tricornutum*.
